# Supplementary material
Source: publisher figshare collection journal article supplement (https://frontiersin.figshare.com/ndownloader/files/16918781)
Supplement: Supplementary file 1 [file 16918781]

## Sheet: Sheet1
Y	D	Cage	YDC	M	F	SP	SPM	SPF	Repstage	Age	Test	Tarsus	Wing	Noffs	Weight
2014	527	3	2014 527 3	1010	961	F/M	F	M	0	8	1			4	0.8275
2014	610	3	2014 610 3	1010	961	F/M	F	M	1	10	1	12.2	17.05	2	6.495
2014	616	3	2014 616 3	1010	961	F/M	F	M	2	16	1	15.87	39.5	2	10.995
2014	706	3	2014 706 3	1010	961	F/M	F	M	3	36	1	16.05	55.5	2	11.855
2014	813	3	2014 813 3	1010	905	F/F	F	F	0	8	2			4	0.9975
2014	827	3	2014 827 3	1010	905	F/F	F	F	1	10	2	12.985	21.625	4	8.585
2014	902	3	2014 902 3	1010	905	F/F	F	F	2	16	2	15.5025	42	4	11.1675
2014	921	3	2014 921 3	1010	905	F/F	F	F	3	35	2	15.57	53.75	4	11.09
2014	602	5	2014 602 5	940	905	M/F	M	F	0	8	1			4	1.0225
2014	617	5	2014 617 5	940	905	M/F	M	F	1	10	1	13.7667	24.8333	3	8.71
2014	623	5	2014 623 5	940	905	M/F	M	F	2	16	1	15.5933	43.6667	3	10.5733
2014	711	5	2014 711 5	940	905	M/F	M	F	3	35	1	15.52	54.6667	3	11.8133
2014	814	5	2014 814 5	940	961	M/M	M	M	0	8	2			5	0.79
2014	831	5	2014 831 5	940	961	M/M	M	M	1	10	2	12.78	20	2	6.66
2014	905	5	2014 905 5	940	961	M/M	M	M	2	16	2	15.985	38.25	2	10.79
2014	926	5	2014 926 5	940	961	M/M	M	M	3	36	2	16.13	54.25	2	10.8
2014	1104	7	2014 1104 7	947	913	B/B	B	B	0	8	1			4	0.745
2014	1121	7	2014 1121 7	947	913	B/B	B	B	1	10	1	12.06	20.75	2	7.46
2014	1127	7	2014 1127 7	947	913	B/B	B	B	2	16	1	15.295	41	2	10.735
2014	1216	7	2014 1216 7	947	913	B/B	B	B	3	35	1	15.555	56	2	11.41
2015	220	7	2015 220 7	947	934	B/B	B	B	0	8	2			4	0.8425
2015	307	7	2015 307 7	947	934	B/B	B	B	1	10	2	10.08	13.3333	3	5.08667
2015	313	7	2015 313 7	947	934	B/B	B	B	2	16	2	14.9067	33.1667	3	7.78333
2015	401	7	2015 401 7	947	934	B/B	B	B	3	35	2	15.42	53	3	8.46333
2014	607	8	2014 607 8	910	951	F/M	F	M	0	8	1			5	0.94
2014	621	8	2014 621 8	910	951	F/M	F	M	1	10	1	11.07	15.3333	3	5.02
2014	627	8	2014 627 8	910	951	F/M	F	M	2	16	1	15.7133	37.8333	3	11.2567
2014	716	8	2014 716 8	910	951	F/M	F	M	3	35	1	15.8967	53	3	12.06
2014	811	8	2014 811 8	910	991	F/F	F	F	0	8	2			5	0.854
2014	826	8	2014 826 8	910	991	F/F	F	F	1	10	2	12.735	20.875	4	7.5375
2014	901	8	2014 901 8	910	991	F/F	F	F	2	16	2	16.0875	41.5	4	10.935
2014	921	8	2014 921 8	910	991	F/F	F	F	3	36	2	16.0025	53.5	4	12.2375
2014	528	9	2014 528 9	917	991	M/F	M	F	0	9	1			5	0.832
2014	609	9	2014 609 9	917	991	M/F	M	F	1	10	1	12.176	21.8	5	6.394
2014	616	9	2014 616 9	917	991	M/F	M	F	2	16	1	15.394	41.8	5	9.438
2014	706	9	2014 706 9	917	991	M/F	M	F	3	37	1	15.494	54	5	11.22
2014	816	9	2014 816 9	917	951	M/M	M	M	0	8	2			4	0.9325
2014	831	9	2014 831 9	917	951	M/M	M	M	1	10	2	13.445	22.75	4	7.1425
2014	905	9	2014 905 9	917	951	M/M	M	M	2	16	2	15.7175	41	4	10.275
2014	926	9	2014 926 9	917	951	M/M	M	M	3	36	2	15.6025	52.75	4	11.4775
2014	629	11	2014 629 11	927	956	M/F	M	F	0	8	1			5	0.898
2014	715	11	2014 715 11	927	956	M/F	M	F	1	10	1	13.6333	24.1667	3	8.32333
2014	721	11	2014 721 11	927	956	M/F	M	F	2	16	1	15.36	41.3333	3	9.25333
2014	809	11	2014 809 11	927	956	M/F	M	F	3	35	1	15.2067	53.5	3	11.3333
2015	204	11	2015 204 11	927	978	M/M	M	M	0	8	2			3	0.853333
2015	218	11	2015 218 11	927	978	M/M	M	M	1	10	2	11.61	18	2	6.2
2015	224	11	2015 224 11	927	978	M/M	M	M	2	16	2	14.775	39	2	10.2
2015	315	11	2015 315 11	927	978	M/M	M	M	3	35	2	15.5	54.25	2	11.75
2014	711	12	2014 711 12	945	1033	B/B	B	B	0	8	1			5	0.988
2014	725	12	2014 725 12	945	1033	B/B	B	B	1	10	1	13.89	24.6667	3	8.93
2014	731	12	2014 731 12	945	1033	B/B	B	B	2	16	1	15.75	44.5	3	10.6567
2014	819	12	2014 819 12	945	1033	B/B	B	B	3	35	1	15.5433	56	3	12.31
2014	1110	12	2014 1110 12	945	1031	B/B	B	B	0	8	2			6	0.965
2014	1121	12	2014 1121 12	945	1031	B/B	B	B	1	10	2	13.57	25	3	4.62333
2014	1127	12	2014 1127 12	945	1031	B/B	B	B	2	16	2	14.1233	29.1667	3	8.57667
2014	1216	12	2014 1216 12	945	1031	B/B	B	B	3	35	2	15.36	54.8333	3	10.7233
2015	219	14	2015 219 14	1037	998	M/M	M	M	0	8	1			1	1.01
2015	304	14	2015 304 14	1037	998	M/M	M	M	1	10	1	11.55	15.5	1	6.55
2015	310	14	2015 310 14	1037	998	M/M	M	M	2	16	1	15.02	33	1	9.17
2015	330	14	2015 330 14	1037	998	M/M	M	M	3	36	1	15.69	54.5	1	11.63
2014	619	15	2014 619 15	1032	1012	B/B	B	B	0	8	1			5	0.832
2014	701	15	2014 701 15	1032	1012	B/B	B	B	1	10	1	12.45	19.8333	3	7.08333
2014	708	15	2014 708 15	1032	1012	B/B	B	B	2	16	1	15.67	41.3333	3	10.46
2014	727	15	2014 727 15	1032	1012	B/B	B	B	3	35	1	16.055	55.75	2	12.67
2014	811	15	2014 811 15	1032	932	B/B	B	B	0	8	2			5	0.96
2014	826	15	2014 826 15	1032	932	B/B	B	B	1	10	2	14.6133	26.5	3	9.41
2014	901	15	2014 901 15	1032	932	B/B	B	B	2	16	2	16.1067	44.3333	3	10.2333
2014	921	15	2014 921 15	1032	932	B/B	B	B	3	36	2	15.9133	55	3	12.0733
2014	603	17	2014 603 17	946	932	B/B	B	B	0	8	1			3	0.853333
2014	618	17	2014 618 17	946	932	B/B	B	B	1	10	1	13.795	22.25	2	8.01
2014	624	17	2014 624 17	946	932	B/B	B	B	2	16	1	16.1	41.5	2	10.79
2014	714	17	2014 714 17	946	932	B/B	B	B	3	35	1	16.075	55.25	2	11.59
2014	829	17	2014 829 17	946	1012	B/B	B	B	0	8	2			5	0.846
2014	914	17	2014 914 17	946	1012	B/B	B	B	1	10	2	13.3133	21.1667	3	7.90667
2014	919	17	2014 919 17	946	1012	B/B	B	B	2	15	2	16.6067	41.8333	3	10.9833
2014	1009	17	2014 1009 17	946	1012	B/B	B	B	3	35	2	16.4033	54.5	3	11.8667
2014	605	18	2014 605 18	986	1030	B/B	B	B	0	9	1			2	0.945
2014	619	18	2014 619 18	986	1030	B/B	B	B	1	9	1	13.48	22.5	1	8.5
2014	626	18	2014 626 18	986	1030	B/B	B	B	2	16	1	15.24	41.5	1	10.47
2014	715	18	2014 715 18	986	1030	B/B	B	B	3	35	1	15.67	54	1	11.66
2014	814	18	2014 814 18	986	1029	B/B	B	B	0	8	2			3	0.833333
2014	827	18	2014 827 18	986	1029	B/B	B	B	1	10	2	15.035	30.5	2	10.07
2014	902	18	2014 902 18	986	1029	B/B	B	B	2	16	2	16.295	47.5	2	11.13
2014	921	18	2014 921 18	986	1029	B/B	B	B	3	35	2	15.76	54.5	2	12.285
2014	906	19	2014 906 19	960	953	M/M	M	M	0	8	1			4	1.1125
2014	921	19	2014 921 19	960	953	M/M	M	M	1	10	1	13.14	22.625	4	7.465
2014	927	19	2014 927 19	960	953	M/M	M	M	2	16	1	15.3725	41.5	4	9.8725
2014	1016	19	2014 1016 19	960	953	M/M	M	M	3	35	1	15.3375	53.125	4	11.575
2014	613	20	2014 613 20	995	1004	M/M	M	M	0	8	1			6	1.03833
2014	628	20	2014 628 20	995	1004	M/M	M	M	1	10	1	11.3467	17	3	6.10667
2014	706	20	2014 706 20	995	1004	M/M	M	M	2	16	1	15.23	41	3	9.84667
2014	724	20	2014 724 20	995	1004	M/M	M	M	3	35	1	15.6967	54.1667	3	12.5233
2014	603	21	2014 603 21	912	989	B/B	B	B	0	8	1			3	0.73
2014	618	21	2014 618 21	912	989	B/B	B	B	1	10	1	12.915	21.25	2	9.525
2014	624	21	2014 624 21	912	989	B/B	B	B	2	16	1	15.58	41.25	2	11.47
2014	714	21	2014 714 21	912	989	B/B	B	B	3	35	1	15.65	53.5	2	12.115
2014	812	21	2014 812 21	912	1030	B/B	B	B	0	8	2			3	0.826667
2014	827	21	2014 827 21	912	1030	B/B	B	B	1	10	2	12.05	18.5	1	7.47
2014	902	21	2014 902 21	912	1030	B/B	B	B	2	16	2	14.74	40	1	10.99
2014	921	21	2014 921 21	912	1030	B/B	B	B	3	35	2	15.25	53	1	11.04
2014	1104	22	2014 1104 22	948	978	F/M	F	M	0	8	1			3	0.876667
2014	1119	22	2014 1119 22	948	978	F/M	F	M	1	10	1	11.24	15	1	5.79
2014	1125	22	2014 1125 22	948	978	F/M	F	M	2	16	1	14.97	36	1	11.69
2014	1215	22	2014 1215 22	948	978	F/M	F	M	3	36	1	15.61	53	1	11.51
2015	103	22	2015 103 22	948	956	F/F	F	F	0	8	2			5	1.016
2015	119	22	2015 119 22	948	956	F/F	F	F	1	11	2	13.4967	23.5	3	8.40667
2015	125	22	2015 125 22	948	956	F/F	F	F	2	17	2	15.5033	42.0167	3	10.23
2015	212	22	2015 212 22	948	956	F/F	F	F	3	35	2	15.9233	52.8333	3	11.9933
2014	1107	24	2014 1107 24	1003	934	B/B	B	B	0	8	1			5	0.87
2014	1121	24	2014 1121 24	1003	934	B/B	B	B	1	10	1	11.47	17.25	5	5.142
2014	1127	24	2014 1127 24	1003	934	B/B	B	B	2	16	1	14.528	35.9	5	7.996
2014	1216	24	2014 1216 24	1003	934	B/B	B	B	3	35	1	15.255	54.75	2	8.935
2015	115	24	2015 115 24	1003	913	B/B	B	B	0	8	2			5	0.862
2015	201	24	2015 201 24	1003	913	B/B	B	B	1	10	2	13.075	25.5	2	7.39
2015	207	24	2015 207 24	1003	913	B/B	B	B	2	16	2	15.2	42.75	2	9.61
2015	227	24	2015 227 24	1003	913	B/B	B	B	3	36	2	15.475	53.5	2	11.33
2015	320	25	2015 320 25	921	955	F/F	F	F	0	8	1			5	0.99
2015	403	25	2015 403 25	921	955	F/F	F	F	1	10	1	9.72333	11.6667	3	4.13
2015	409	25	2015 409 25	921	955	F/F	F	F	2	16	1	14.0833	32	3	7.83667
2015	428	25	2015 428 25	921	955	F/F	F	F	3	35	1	15.14	52.3333	3	11.44
2014	602	26	2014 602 26	1027	919	M/M	M	M	0	8	1			5	0.994
2014	617	26	2014 617 26	1027	919	M/M	M	M	1	10	1	12.96	19.6667	3	8.89
2014	623	26	2014 623 26	1027	919	M/M	M	M	2	16	1	15.86	43.1667	3	11.4867
2014	711	26	2014 711 26	1027	919	M/M	M	M	3	35	1	15.9133	55	3	13.5433
2014	1112	26	2014 1112 26	1027	935	M/F	M	F	0	8	2			4	1.1
2014	1127	26	2014 1127 26	1027	935	M/F	M	F	1	10	2	12.5	21.5	2	8.25
2014	1203	26	2014 1203 26	1027	935	M/F	M	F	2	16	2	15.33	42.5	2	10.98
2014	1224	26	2014 1224 26	1027	935	M/F	M	F	3	37	2	15.015	54.75	2	11.81
2014	729	27	2014 729 27	918	920	F/F	F	F	0	9	1			5	0.972
2014	811	27	2014 811 27	918	920	F/F	F	F	1	10	1	12.312	17.9	5	5.964
2014	817	27	2014 817 27	918	920	F/F	F	F	2	16	1	15.38	37.9	5	9.692
2014	905	27	2014 905 27	918	920	F/F	F	F	3	35	1	15.796	54.1	5	12.072
2014	1205	27	2014 1205 27	918	996	F/M	F	M	0	8	2			4	0.8825
2014	1221	27	2014 1221 27	918	996	F/M	F	M	1	10	2	13.535	23.5	2	7.545
2014	1227	27	2014 1227 27	918	996	F/M	F	M	2	16	2	15.515	42.5	2	11.04
2015	116	27	2015 116 27	918	996	F/M	F	M	3	36	2	16.025	54	2	11.89
2014	702	29	2014 702 29	975	982	M/F	M	F	0	8	1			2	0.81
2014	715	29	2014 715 29	975	982	M/F	M	F	1	10	1	15.2	28	1	9.02
2014	721	29	2014 721 29	975	982	M/F	M	F	2	16	1	16.5	45	1	10.4
2014	809	29	2014 809 29	975	982	M/F	M	F	3	35	1	16.53	54	1	12.79
2014	1021	29	2014 1021 29	975	944	M/M	M	M	0	8	2			4	1.045
2014	1107	29	2014 1107 29	975	944	M/M	M	M	1	10	2	13.1633	23.1667	3	8.93
2014	1112	29	2014 1112 29	975	944	M/M	M	M	2	16	2	16.0167	41.6667	3	10.9103
2014	1202	29	2014 1202 29	975	944	M/M	M	M	3	35	2	15.89	52.8333	3	11.8433
2014	727	31	2014 727 31	1014	925	F/M	F	M	0	11	1			4	1.0275
2014	809	31	2014 809 31	1014	925	F/M	F	M	1	10	1	12.855	20.125	4	8.48
2014	815	31	2014 815 31	1014	925	F/M	F	M	2	16	1	16.355	41	4	12.4575
2014	903	31	2014 903 31	1014	925	F/M	F	M	3	35	1	16.4675	54.875	4	13.1375
2014	1107	31	2014 1107 31	1014	949	F/F	F	F	0	8	2			5	0.894
2014	1123	31	2014 1123 31	1014	949	F/F	F	F	1	10	2	12.87	21.875	4	7.3275
2014	1128	31	2014 1128 31	1014	949	F/F	F	F	2	15	2	15.315	36.625	4	9.0875
2014	1218	31	2014 1218 31	1014	949	F/F	F	F	3	35	2	15.855	52.75	2	10.435
2014	1114	35	2014 1114 35	1020	941	F/M	F	M	0	8	1			2	0.765
2014	1128	35	2014 1128 35	1020	941	F/M	F	M	1	10	1	10.58	15	1	5.26
2014	1204	35	2014 1204 35	1020	941	F/M	F	M	2	16	1	14.65	35	1	11.53
2014	1224	35	2014 1224 35	1020	941	F/M	F	M	3	36	1	15.41	51.5	1	11.04
2014	531	36	2014 531 36	901	996	M/M	M	M	0	9	1			4	0.9275
2014	616	36	2014 616 36	901	996	M/M	M	M	1	10	1	13.255	22.5	2	7.325
2014	621	36	2014 621 36	901	996	M/M	M	M	2	16	1	15.1	41	2	10.275
2014	710	36	2014 710 36	901	996	M/M	M	M	3	35	1	15.6	55.75	2	11.83
2014	1114	36	2014 1114 36	901	920	M/F	M	F	0	8	2			5	0.93
2014	1128	36	2014 1128 36	901	920	M/F	M	F	1	10	2	11.9167	17.1667	3	6.53667
2014	1204	36	2014 1204 36	901	920	M/F	M	F	2	16	2	15.72	39.6667	3	10.7133
2014	1224	36	2014 1224 36	901	920	M/F	M	F	3	36	2	15.435	55.25	2	10.12
2014	716	37	2014 716 37	1035	944	F/M	F	M	0	8	1			3	0.9
2014	730	37	2014 730 37	1035	944	F/M	F	M	1	10	1	13.32	19.8333	3	8.18
2014	805	37	2014 805 37	1035	944	F/M	F	M	2	16	1	15.9567	40	3	10.7933
2014	825	37	2014 825 37	1035	944	F/M	F	M	3	35	1	15.9167	53.6667	3	11.11
2014	1122	37	2014 1122 37	1035	982	F/F	F	F	0	8	2			3	0.96
2014	1205	37	2014 1205 37	1035	982	F/F	F	F	1	10	2	11.78	18.25	2	6.685
2014	1211	37	2014 1211 37	1035	982	F/F	F	F	2	16	2	15.06	38.25	2	8.77
2015	102	37	2015 102 37	1035	982	F/F	F	F	3	38	2	15.7	52	1	10.54
2014	602	38	2014 602 38	1011	1029	B/B	B	B	0	8	1			5	0.888
2014	617	38	2014 617 38	1011	1029	B/B	B	B	1	10	1	14.28	25.8333	3	8.84
2014	623	38	2014 623 38	1011	1029	B/B	B	B	2	16	1	16.1567	43.8333	3	10.8167
2014	711	38	2014 711 38	1011	1029	B/B	B	B	3	35	1	15.9633	56	3	12.2733
2014	817	38	2014 817 38	1001	989	B/B	B	B	0	8	2			3	0.906667
2014	831	38	2014 831 38	1001	989	B/B	B	B	1	10	2	14.085	25.25	2	8.04
2014	905	38	2014 905 38	1001	989	B/B	B	B	2	16	2	16.065	41.75	2	11.135
2014	926	38	2014 926 38	1001	989	B/B	B	B	3	36	2	16.385	53.5	2	13.05
2014	715	39	2014 715 39	958	949	M/F	M	F	0	8	1			4	0.675
2014	729	39	2014 729 39	958	949	M/F	M	F	1	10	1	10.935	13.5	2	6.03
2014	807	39	2014 807 39	958	949	M/F	M	F	2	19	1	15.22	41.75	2	11.145
2014	823	39	2014 823 39	958	949	M/F	M	F	3	35	1	14.78	50	2	12.43
2014	1111	39	2014 1111 39	958	925	M/M	M	M	0	8	2			4	1.0425
2014	1126	39	2014 1126 39	958	925	M/M	M	M	1	10	2	11.2233	16.3333	3	7.12667
2014	1202	39	2014 1202 39	958	925	M/M	M	M	2	16	2	15.34	38.8333	3	11.45
2014	1221	39	2014 1221 39	958	925	M/M	M	M	3	35	2	14.93	55	1	8.84
2014	629	41	2014 629 41	1017	935	F/F	F	F	0	8	1			5	1.016
2014	715	41	2014 715 41	1017	935	F/F	F	F	1	10	1	15.05	30.1667	3	10.3567
2014	721	41	2014 721 41	1017	935	F/F	F	F	2	16	1	15.96	45	3	10.2933
2014	809	41	2014 809 41	1017	935	F/F	F	F	3	35	1	15.6967	54.3333	3	12.8267
2014	910	41	2014 910 41	1017	919	F/M	F	M	0	8	2			6	0.845
2014	926	41	2014 926 41	1017	919	F/M	F	M	1	10	2	13.1667	26.6667	3	9.45333
2014	1002	41	2014 1002 41	1017	919	F/M	F	M	2	16	2	15.46	43	3	10.61
2014	1021	41	2014 1021 41	1017	919	F/M	F	M	3	35	2	15.7133	55.3333	3	11.8867
2014	613	42	2014 613 42	984	1031	B/B	B	B	0	8	1			6	0.991667
2014	627	42	2014 627 42	984	1031	B/B	B	B	1	10	1	12.975	21.75	4	7.955
2014	703	42	2014 703 42	984	1031	B/B	B	B	2	16	1	15.3025	41.875	4	9.8775
2014	722	42	2014 722 42	984	1031	B/B	B	B	3	35	1	16.01	54.375	4	11.945
